# Supplementary material for: Perception of Assisted Reproductive Technology Among Infertile Married Couples and Stress Faced due to Infertility in Pakistan: A Cross-Sectional Study
Source: Research Square preprint supplement (doi:10.21203/rs.3.rs-7284839/v1), 2025-08-21
Supplement: Supplementary file 1 [file 04212d4e9121470cdec48bb9.docx]

**PERCEPTION AND STRESS AMONG INFERTILE MARRIED COUPLES**

**Data Collection Tool Part 1**

**Questionnaire**

**Consent statement**

Assalamualaikum myself **Wajeeha Ali** from Riphah International University doing Mphil Pharmacy Practice working on research concerned with the pattern of Perception and Stress among infertile couples. We invite you to participate in this research via filling the following survey which will only take few minutes. Your participation is optional, and you have the right to opt out of this questionnaire at any given moment, without any consequences. Your participation is of great importance to us and will add a lot of valuable information to this topic. You will not need to share any sensitive or defining information concerning your identity and the information in this survey will not be shared with any people other than the researchers working on this research

If you have any question, do not hesitate to contact us at [wajeeha.ali456@gmail.com](mailto:wajeeha.ali456@gmail.com)

**Check all that apply**

- I have read the details as mentioned earlier and I agree to participate in this research
- I decline to participate

**Section 1. Demographics**

Name(optional)________________

1. Gender?

- Male
- Female

2. Age? __________________

3. Level of education?

- Illiterate
- Matriculation
- Intermediate
- Graduate
- Others___________

4. Monthly household income?

- 20,000
- 20,000-40,000
- 40,000-60,000
- 60,000 or above specify___________

5. Do you have health insurance?

- Yes
- No

9. Employment Status?

- Employed
- Own Business
- Unemployed
- Retired
- Housewife
- Student
- Others______________

10. Residential Status?

- Rural area
- Urban area

11. What source do you rely on for obtaining medical information? (check all the apply)

Check all that apply.

- Internet/social media
- Friends and family
- Consulting a doctor
- Pharmacist
- Official medical websites ( Ministry of health, WHO, CDC, hospital
- Others____________________

14. Do you have children?

- Yes I have / I am pregnant
- No, but I want to plan to have children
- No, and I do not want/ do not plan to have children

(if the answer of this question is yes then please go through from the next question but if the answer is no you can skip the next 3 questions in the series)

15. Do you conceive by natural process?

- Yes
- No
- Others___________

16. Have you faced any complications while achieving that pregnancy?

- Yes
- No
- Others______________

17. Have you started any therapy or treatment for that pregnancy?

- Yes
- No
- Others_____________

18. Do you get any proper diagnosis of your infertility?

- Yes
- No
- Others _______________

19. Have you ever heard the term Assisted Reproductive Technology?

- Yes
- No

20. If your answer is yes to the above question, please specify which Assisted Reproductive Technology you know (you can select more than one option depending upon your knowledge)

- In Vitro fertilization
- Intrauterine insemination
- Gamete intrafallopian transfer
- Surrogacy
- Egg donation
- Sperm donation
- Others______________

21. Do you take any medicine for infertility treatment on the doctor's advice?

- Yes
- No
- Others____________

22. If yes to the above question please select which medicine you use from the given option and if any other medicine you use other than specify the name (you can select more than one option)

- - Clomiphene citrate
  - Gonadotropins
  - Human chronic gonadotropin
  - Letrozole
  - Progesterone
  - Lupron
  - Cetrotide
  - Others______________

**_________________________________________________________________**

**Section 2: Perception of Assisted Reproductive Technology among married couples.**

23. In your opinion, can the adoption of a child be an alternative to infertility treatment, including any assisted reproductive technology?

- Yes
- No
- Others____________

24. According to your opinion assisted reproductive technology is halal are not?

- Yes
- No
- Others___________

25. Would you use assisted reproductive technology to conceive?

- Yes, regardless of cost
- Yes, if it is free of cost or any other third party sponsored me for procedure
- Yes, but with ethical doubt
- No
- Others___________________

26. Are you worried that children born as result of assisted reproductive technology may have higher risk of genetic defects/mutation?

- Yes
- No
- Others__________

27. Do you think egg or sperm can be change with someone in laboratory?

- Yes
- No
- I do not think so that could be happen

28. Which factor hinders you from using assisted reproductive technology for your infertility treatment?

- Family/Friends
- Cost of the treatment
- My religious belief
- I do not want to have this procedure as I think my children will be genetically weak
- Others______________

**Section 3: Questions related to stress among married couples.**

29. Are you not invited or welcomed to any family event for not being able to get pregnant?

- Rarely
- Sometimes
- Many Times,
- Always

30. Do you get upset when a friend or a relative becomes pregnant?

- Rarely
- Sometimes
- Many Times,
- Always

31. Are you depressed every time you menstruate?

- Rarely
- Sometimes
- Many Times,
- Always

32. Has being unable to have child affected your daily relationship with your spouse?

- Rarely
- Sometimes
- Many Times,
- Always

33. Do you feel inferior to other couples for not having children?

- Rarely
- Sometimes
- Many Times,
- Always

34. Do you have trouble falling asleep when you think about your inability to bear children?

- Rarely
- Sometimes
- Many Times,
- Always

35. Does the thought of not having child make you want to run away from your home?

- Rarely
- Sometimes
- Many Times,
- Always

36. Are you subjected to mental or physical violence due to your inability to become pregnant?

- Never
- Sometimes
- Many times

**Thank you so much for your participation in this survey if you have any comments or any positive feedback feel free to share them with us the research team will critically analyze your opinion and if any changes to the survey will be made** ________________________________________________________________________________________________________________________________________________________________________________________

**Signature (optional)_________________________**

**Data Collection Tool Part 2:**

**EXPLORING THE ROLE OF PHARMACIST IN ASSISTED REPRODUCTIVE TECHNOLOGY**

**Questionnaire**

**Consent statement**

Assalamualaikum myself **Wajeeha Ali** from Riphah International University doing MPhil Pharmacy Practice working on research concerned with the pharmacist's role in Assisted Reproductive Technology. We invite you to participate in this research via filling out the following survey, which will take only a few minutes. Your participation is optional, and you have the right to opt out of this questionnaire at any given moment, without any consequences. Your participation is of great importance to us and will add a lot of valuable information to this topic. You will not need to share any sensitive or defining information concerning your identity and the information in this survey will not be shared with any people other than the researchers working on this research

If you have any question , do not hesitate to contact us at [wajeeha.ali456@gmail.com](mailto:wajeeha.ali456@gmail.com)

**Check all that apply**

- I have read the details as mentioned earlier and I agree to participate in this research
- I decline to participate

**Section 1 Demographics**

Name(optional)________________

1.Gender?

- Male
- Female

2. Age? _______________

3. Level of education?

- Pharm D
- MPhil Scholer
- PHD
- Postdoc

4. Monthly household income?

- 30,000
- 30,000-50,000
- 50,000-70,000
- 70,000-90,000
- 1lac or Above_________________

5. Do you have health insurance?

- Yes
- No

9. Employment Status?

- Employed
- Own Business
- Unemployed
- Retired
- Housewife
- Others______________

10. Residential Status?

- Rural area
- Urban area

11. What is your area of practice as a pharmacist?

- Community Pharmacist
- Hospital Pharmacist
- Clinical pharmacist
- Retail Pharmacist
- Others _____________

12. How many years of experience do you have as a pharmacist?

- - Less than 1 year
  - 1-3 years
  - 3-5 years
  - 5-10 years
  - 10 years or more than_____________

13. Have you ever heard the term Assisted Reproductive Technology?

- Yes
- No

14. If your answer is yes to the above question, please specify which Assisted Reproductive Technology you know (you can select more than one option depending upon your knowledge)

- In Vitro fertilization
- Intrauterine insemination
- Gamete intrafallopian transfer
- Surrogacy
- Egg donation
- Sperm donation
- Others______________

**__________________________________________________________________**

**Section 2 Role of Pharmacist in Assisted Reproductive Technology.**

**Note: These questions assume a basic understanding of Assisted Reproductive Technology and pharmacy roles.**

15. Does the pharmacist directly participate in assisted reproductive technology?

- Yes
- No

16. Is the pharmacist involved in preparing medications used in assisted reproductive technology?

- Yes
- No

17. Does the pharmacist counsel patients about medications used in assisted reproductive technology?

- Yes
- No

18. Is the pharmacist responsible for monitoring drug interactions in patients?

- Yes
- No

19. Does the pharmacist participate in the selection of fertility medications?

- Yes
- No

20. Is the pharmacist involved in managing adverse drug reactions related to fertility medicine?

- Yes
- No

21. Does the pharmacist provide education on medication storage and handling?

- Yes
- No

22. Is the pharmacist responsible for ensuring the availability of necessary medications for assisted reproductive technology?

- Yes
- No

**____________________________________________________________________**

**Section 3. Pharmacist contribution towards Assisted Reproductive Technology.**

**Note: These questions offer more detailed response options than simple yes/no answers.**

23.What is the primary role of the pharmacist in assisted reproductive technology?

- Medication preparation
- Patient counseling
- Drug therapy monitoring
- Other please specify________________

24. How involved is the pharmacist in selecting fertility medications?

- Directly selects medications
- Provides recommendations
- Verifies medication appropriateness
- Not Involved
- Others_________________

25. To what extent does the pharmacist counsel patients about medications used in assisted reproductive technology?

- Provides basic information
- Offers in-depth counseling
- Conducts medication therapy management
- Does not counsel patients
- Others________________

26. What is the pharmacist’s role in monitoring drug interactions in infertile patients opting for any assisted reproductive technology?

- Identifies potential interactions
- Develops management plans
- Collaborates with other healthcare providers
- No involvement in drug interaction monitoring
- Others__________________

27. How does the pharmacist contribute to managing adverse drug reactions in infertile patients opting for assisted reproductive technology?

- Identifies and reports adverse reactions
- Provide patient education on managing side effects
- Collaborates with healthcare providers for treatment
- No involvement in adverse drug reaction management
- Others____________________________

28. What is the pharmacist’s role in ensuring medication safety and efficacy in assisted reproductive technology?

- Verifies medication accuracy and dosage
- Monitors medication supply and expiration dates
- Educates patients on proper medication handling
- All of the above
- Others__________________

29. How does the pharmacist contribute to patient education regarding medications used in assisted reproductive technology?

- Provides written information
- Offers verbal counseling
- Conducts medication therapy management
- All of the above
- Others___________________

30. How does the pharmacist contribute to research related to medications used in assisted reproductive technology?

- Participates in clinical trials
- Conducts pharmacoeconomic studies
- Publishes research findings
- No involvement in research
- Others___________________

31. How does the pharmacist contribute to patient satisfaction with treatment used in infertility management by assisted reproductive technology?

- Improves medication accessibility
- Enhances patient communication
- Optimizes medication therapy
- All of the above
- Others________________

32. What is the pharmacist’s role in promoting medication safety in assisted reproductive technology?

- Identifies medication errors
- Implements preventive measures
- Educates staff on medication safety
- All of the above
- Others________________________

33. What is the pharmacist’s role in managing medication shortages that impact assisted reproductive technology treatment?

- Identifies potential shortages
- Develop mitigation strategies
- Communicate with healthcare providers
- All of the above

34. How does the pharmacist contribute to the evaluation of the effectiveness of medications used in assisted reproductive technology?

- Collects patient outcomes data
- Analyzes medication effectiveness
- Recommends medication changes
- No involvement in medication evaluation
- Others______________

35. What is the pharmacist’s role in supporting the emotional well-being of infertile patients?

- Provides empathetic counseling
- Offers information on coping strategies
- Collaborates with mental health professionals
- No involvement in emotional support
- Others______________________

**Thank you so much for participating in my study you can provide your valuable feedback and our research team will do their best to make any changes if required.**

**_____________________________________________________________________________________________________________________________________________________________________________________________________________________________________**

**Respondent sign________________**
