# Supplementary material for: Perception of Assisted Reproductive Technology Among Infertile Married Couples and Stress Faced due to Infertility in Pakistan: A Cross-Sectional Study
Source: Research Square preprint supplement (doi:10.21203/rs.3.rs-7284839/v1), 2025-08-21
Supplement: Supplementary file 2 [file 80724d78374e5a6435fbc8fa.docx]

**Table :**

**Perception of Assisted Reproductive Technology among Infertile Couples (N = 380)**

| Item | Response Category | *f* | % |
| --- | --- | --- | --- |
| In your opinion, can adoption be an alternative to infertility treatment including ART? | Yes | 170 | 44.7% |
|  | No | 209 | 55.0% |
|  | Others | 1 | 0.3% |
| In your opinion, is ART halal or not? | Yes | 158 | 41.6% |
|  | No | 221 | 58.2% |
|  | Others | 1 | 0.3% |
| Would you use ART to conceive? | Yes, regardless of cost | 49 | 12.9% |
|  | Yes, if it is free or a third person pays for it | 53 | 13.9% |
|  | Yes, but with ethical doubt | 155 | 40.8% |
|  | No | 211 | 55.5% |
| Are you worried that children born as a result of ART have a higher risk of defects? | Yes | 231 | 60.8% |
|  | No | 149 | 39.2% |
| Do you think egg or sperm can be changed with someone else’s in the laboratory? | Yes | 230 | 60.5% |
|  | No | 150 | 39.5% |
| Which factor hinders you from using ART for infertility treatment? (Multiple responses) | Family and friends | 291 | 76.6% |
|  | Cost of the treatment | 196 | 51.6% |
|  | My religious beliefs | 181 | 47.6% |
|  | I think my children will be genetically ill | 162 | 42.6% |
|  | Others | 49 | 12.9% |

**Table :**

**Stress Due to Infertility among Infertile Couples (N = 380)**

| Item | Response Category | *F* | % |
| --- | --- | --- | --- |
| Are you not invited or welcomed to any family events for not being able to have children | Rarely | 20 | 5.3% |
|  | Sometimes | 138 | 36.3% |
|  | Many times | 166 | 43.7% |
|  | Always | 56 | 14.7% |
| Are you upset when your friend or a relative becomes pregnant | Rarely | 10 | 2.6% |
|  | Sometimes | 132 | 34.7% |
|  | Many times | 170 | 44.7% |
|  | Always | 68 | 17.9% |
| Are you depressed every time you menstruate (Female-specific) | Rarely | 3 | 0.8% |
|  | Sometimes | 113 | 29.7% |
|  | Many times | 188 | 49.5% |
|  | Always | 76 | 20.0% |
| Has being unable to have children affected your daily relationship with your spouse | Rarely | 132 | 34.7% |
|  | Sometimes | 124 | 32.6% |
|  | Many times | 180 | 47.4% |
|  | Always | 63 | 16.6% |
| Do you feel inferior to other couples for not having children | Rarely | 17 | 4.5% |
|  | Sometimes | 124 | 32.6% |
|  | Many times | 189 | 49.7% |
|  | Always | 50 | 13.2% |
| Do you have trouble falling asleep when thinking about infertility | Rarely | 48 | 12.6% |
|  | Sometimes | 141 | 37.1% |
|  | Many times | 156 | 41.1% |
|  | Always | 35 | 9.2% |
| Does the thought of not having a child make you want to run away from your home | Rarely | 103 | 27.1% |
|  | Sometimes | 150 | 39.5% |
|  | Many times | 116 | 30.5% |
|  | Always | 11 | 2.9% |
| Are you subjected to mental or physical violence due to infertility | Never | 170 | 44.7% |
|  | Sometimes | 117 | 30.8% |
|  | Many times | 88 | 23.2% |
|  | Always | 5 | 1.3% |

**Table Gender vs. knowledge related to ART procedures**

| **Response Category** | **Female (%)** | **Female (N)** |
| --- | --- | --- |
| IVF only | 37.1% | 98 |
| IVF + Egg donation + Surrogacy | 0.4% | 1 |
| IVF + Surrogacy + Egg + Sperm donation | 5.7% | 15 |
| None | 6.1% | 16 |

**Table: Female correlation with (do you get proper diagnosis of infertility?)**

| **Gender** | **No (%)** | **No (N)** | **Skip/Others (%)** | **Skip/Others (N)** |
| --- | --- | --- | --- | --- |
| Female | 12.9% | 25 | 1.1% | 2 |
| Male | 14.7% | 28 | 0.9% | 2 |

**Table: Gender and correlation of perception of couples towards ART procedures**

| **Question/Response** | **Female (%)** | **Female (N)** |
| --- | --- | --- |
| Adoption as alternative (Yes) | 45.1% | 119 |
| ART is Halal (Yes) | 42.0% | 111 |
| Would you use ART? (No) | 53.0% | 140 |
| Would you use ART? (Yes, with ethical doubt) | 29.2% | 77 |
| ART child has genetic risk (Yes) | 61.4% | 162 |
| Lab replacement of egg/sperm (Yes) | 61.4% | 162 |
